# Supplementary material
Source: MDPI journal article supplement (https://www.mdpi.com/2072-4292/8/5/420)
Supplement: s1 [file s1]

## Article

# Diatom Phenology in the Southern Ocean: Mean Patterns, Trends and the Role of Climate Oscillations

Mariana A. Soppa <sup>1,\*</sup>, Christoph Völker <sup>2</sup> and Astrid Bracher <sup>1,3</sup>

<sup>1</sup> Alfred Wegener Institute, Bussestraße 24, D-27570 Bremerhaven, Germany

<sup>2</sup> Alfred Wegener Institute, Am Handelshafen 12, D-27570 Bremerhaven, Germany

<sup>3</sup> Institute of Environmental Physics, University of Bremen, D-28334 Bremen, Germany

\* msoppa@awi.de, Tel.: +49(471)4831-1869.

Received: 8 March 2016; Accepted: 5 May 2016; Published: xx

## 1. Supplementary Figures

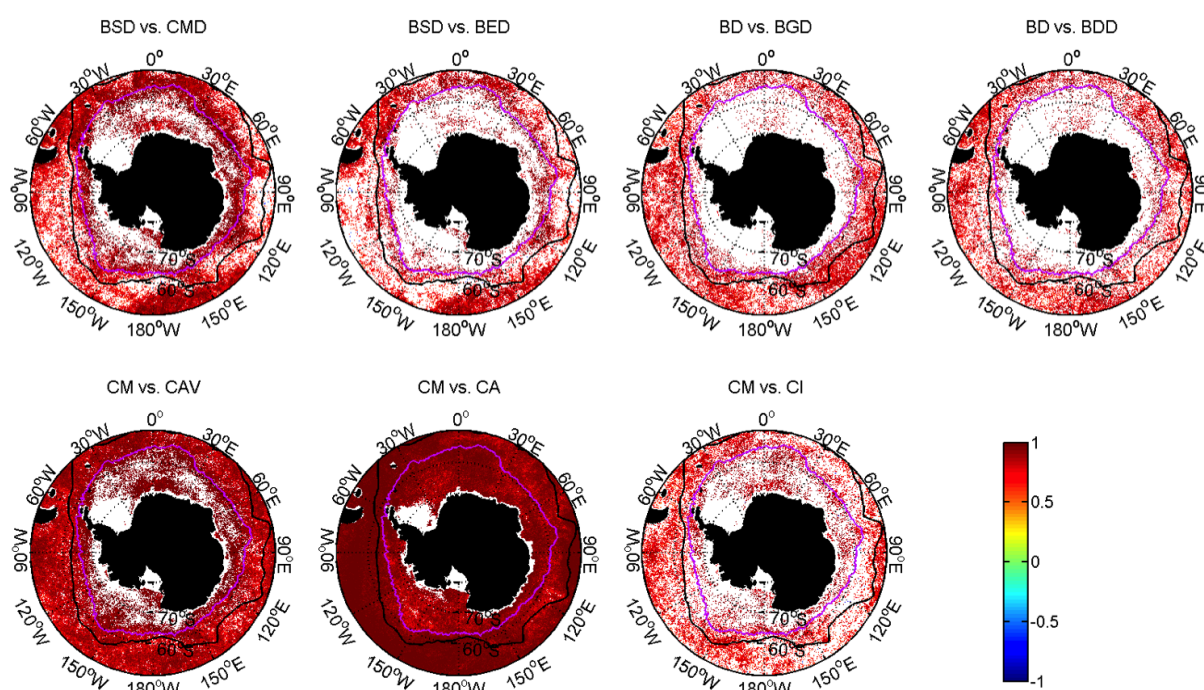

**Figure S1.** Spearman correlation coefficients between the time series of phenological indices (15-yr, 1997–2012): bloom start date (BSD), date of Dia-Chla maximum (CMD), bloom end date (BED), bloom growth duration (BGD), bloom decline duration (BDD), bloom duration (BD), Dia-Chla maximum (CM), Dia-Chla amplitude (CA), Dia-Chla averaged BGD (CAV), Dia-Chla integrated over BGD (CI). Only statistically significant trends ( $p < 0.05$ ) are shown. White areas correspond to non-significant correlations or missing data. Black lines show the mean position of the Polar Front [1] over 1997–2012. Purple line displays the median position of the maximum sea ice extent [2] over 1997–2012.

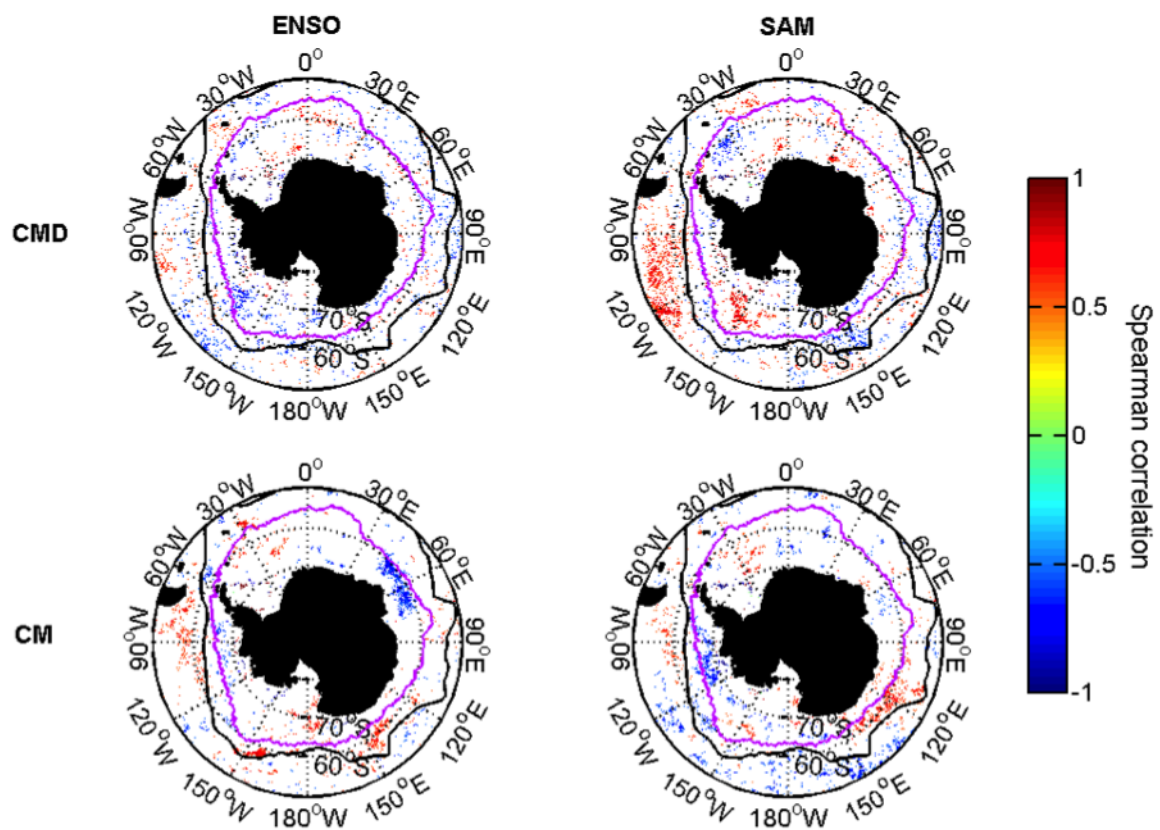

**Figure S2.** Partial correlation coefficients of the standardized anomalies of date of Dia-Chla maximum (CMD) and Dia-Chla maximum (CM) *vs.* ENSO (MEI) and SAM (AAO) indices. Only statistically significant trends ( $p < 0.05$ ) are shown. Black lines show the mean position of the Polar Front [1] over 1997–2012. Purple line displays the median position of the maximum sea ice extent [2] over 1997–2012.

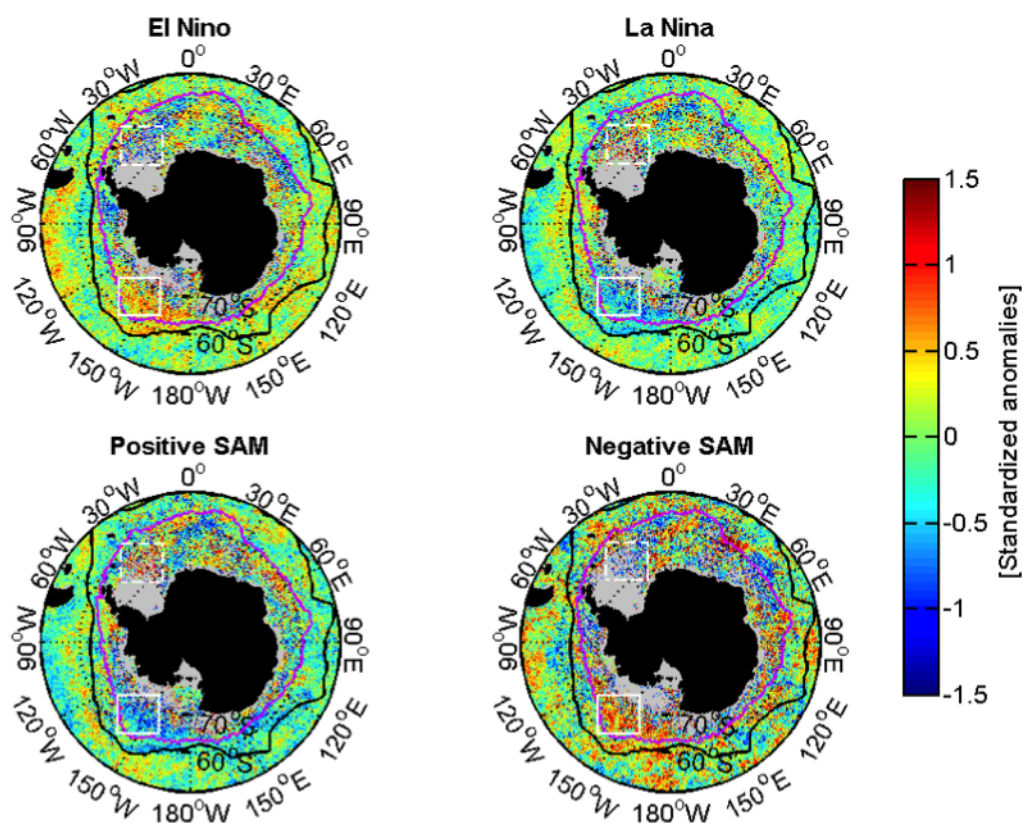

**Figure S3.** Composites of bloom duration (BD) standardized anomalies during El Niño ( $N = 6$ ), La Niña ( $N = 8$ ), positive SAM ( $N = 7$ ) and negative SAM ( $N = 4$ ) years. Grey areas represent missing data. Black lines show the mean position of the Polar Front [1] over 1997–2012. Purple line displays the median position of the maximum sea ice extent [2] over 1997–2012. The white boxes depict the Weddell Sea region (dashed) and the sector between 120° W and 180° W.

## References

1. Sallée, J.; Speer, K.; Morrow, R. Southern Ocean fronts and their variability to climate modes. *J. Clim* **2008**, *21*, 3020–3039.
2. Fetterer, F.; Knowles, K.; Meier, W.; Savoie, M. Sea Ice Index. Boulder, CO: National Snow and Ice Data Center. *Digital Media* **2002**, *6*. Available online: <ftp://sidads.colorado.edu/DATASETS/NOAA/G02135/shapefiles/> (accessed on 13 May 2016).

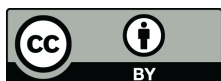

© 2016 by the authors; licensee MDPI, Basel, Switzerland. This article is an open access article distributed under the terms and conditions of the Creative Commons Attribution (CC-BY) license (<http://creativecommons.org/licenses/by/4.0/>).
